# Supplementary material for: Monoclonal antibody production and development of immunochromatographic strip assays for screening of the herbicide bispyribac-sodium in rice
Source: Royal Society of Chemistry journal article supplement (doi:10.1039/d3ay00915g), 2023-01-01
Supplement: d3ay00915g1.pdf [file d3ay00915g1.pdf]

1

*Supplementary material*

2

**Monoclonal antibody production and development of**

3

**immunochematographic strip assays for screening of the herbicide**

4

**bispyribac-sodium in rice**

5 Mengjia Chao<sup>a,b</sup>, Xinxin Xu<sup>a,b</sup>, Aihong Wu<sup>a,b</sup>, Wei Zhou<sup>c</sup>, Chuanlai Xu<sup>a,b</sup>, Liqiang Liu<sup>a,b\*</sup>, Lingling  
6 Guo<sup>a,b\*</sup>

7

8 <sup>a</sup>State Key Laboratory of Food Science and Resources, Jiangnan University, <sup>b</sup>International Joint Research

9 Laboratory for Biointerface and Biodetection, and School of Food Science and Technology, Jiangnan University,

10 Wuxi, Jiangsu, 214122, China; <sup>c</sup>Jiangsu Product Quality Testing and Inspection Institute, Nanjing, Jiangsu,

11 210000, China

12

13 **List of contents:**

14 1. Fig. S1. LC-MS analysis of BIS standard solution (a) and rice samples (b).

15 2. Fig. S2. UV identification of BIS antigens; (a) Confirmation of immunogen (BIS-  
16 BSA); (b) Confirmation of coating antigen (BIS-OVA).

17 3. Table S1. Instrument parameters for the analysis of BIS by LC-MS/MS.

18 4. Table S2. Cross-reactivity of analogues of BIS to the mAb 4B1.

---

\*Email: murel@163.com

\*Email: gling0329@jiangnan.edu.cn.

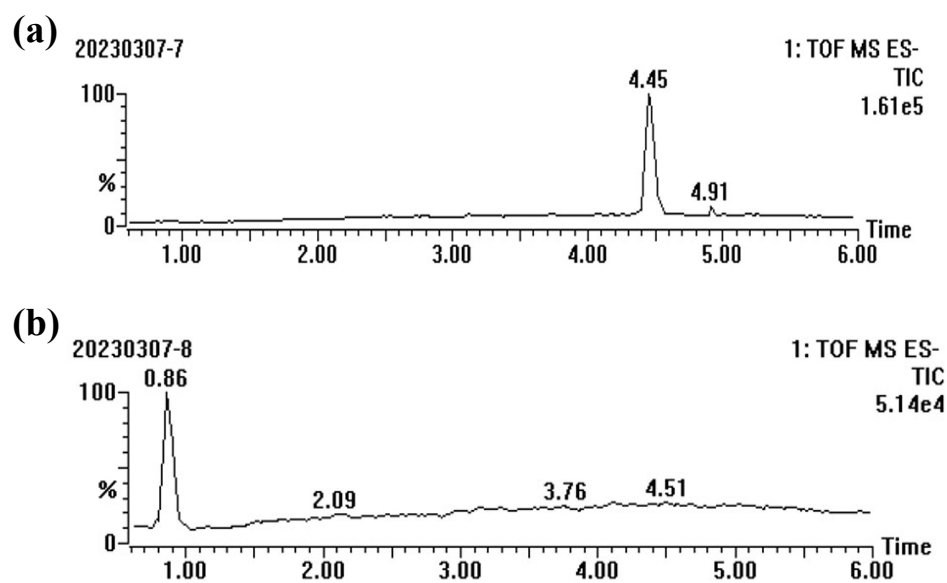

20

21

**Fig. S1.** LC-MS analysis of BIS standard solution (a) and rice samples (b).

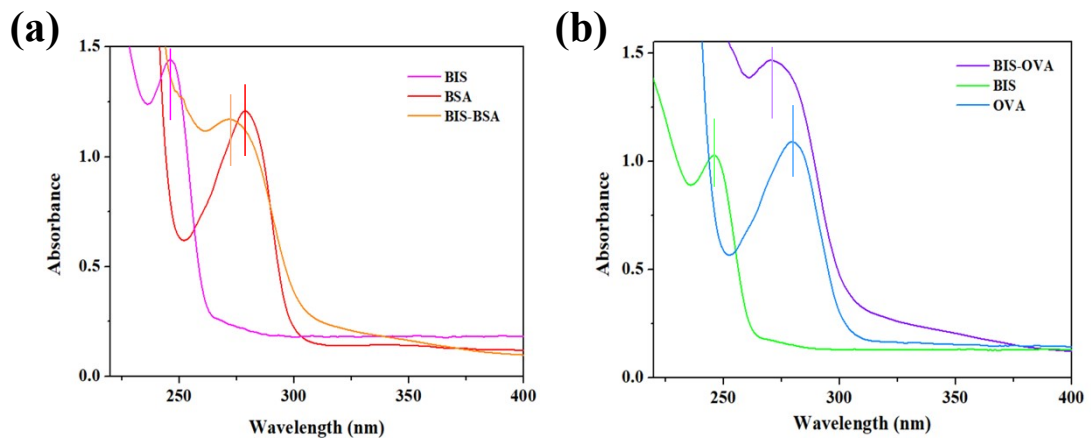

22

23 **Fig. S2.** UV identification of BIS antigens; (a) Confirmation of immunogen (BIS-

24 BSA); (b) Confirmation of coating antigen (BIS-OVA).

**Table S1.** Instrument parameters for the analysis of BIS by LC-MS/MS.

| Instrument conditions |                                              |                                         |
|-----------------------|----------------------------------------------|-----------------------------------------|
| Column                | BEH C18 column (100 mm ×2.1 mm i.d., 1.8 μm) |                                         |
| Flow rate             | 0.3 mL/min                                   |                                         |
| Column temperature    | 40°C                                         |                                         |
| Injection volume      | 2 μL                                         |                                         |
| Gradient timetable    |                                              |                                         |
| Time (min)            | Acetonitrile (%)                             | 0.1% formic acid in ultrapure water (%) |
| 0                     | 5                                            | 95                                      |
| 1                     | 5                                            | 95                                      |
| 2.5                   | 40                                           | 60                                      |
| 18                    | 98                                           | 2                                       |
| 23                    | 98                                           | 2                                       |
| 23.1                  | 3                                            | 97                                      |
| 27                    | 3                                            | 97                                      |
| Mass Parameters       | Auxiliary heating gas: 50 psi                |                                         |
|                       | Auxiliary heating gas: 50 psi                |                                         |
|                       | Ion Source: Electrospray ion source          |                                         |
|                       | Polarity: Positive                           |                                         |
|                       | Source Temperature: 350°C                    |                                         |
|                       | Ionspray voltage: 5500 V                     |                                         |

28 **Table S2.** Cross-reactivity of analogues of BIS to the mAb 4B1.

| chemicals                 | structures                                                                           | CR (IC <sub>50</sub> ) |
|---------------------------|--------------------------------------------------------------------------------------|------------------------|
| BIS                       | 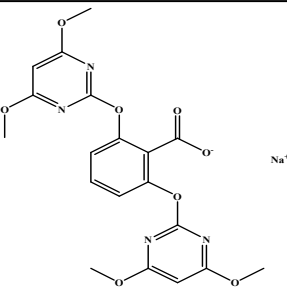    | 100%<br>(0.093 ng/mL)  |
| Pyriethion sodium         |     | <0.1%<br>(>100 ng/mL)  |
| Pyrimethamine             |     | <0.1%<br>(>100 ng/mL)  |
| Pyribenzoxim              |    | <0.1%<br>(>100 ng/mL)  |
| pyrifthalid               |   | <0.1%<br>(>100 ng/mL)  |
| 2,6-Dihydroxybenzoic acid |   | <0.1%<br>(>100 ng/mL)  |
| Tribenuron methyl         |  | <0.1%<br>(>100 ng/mL)  |

29
